# Supplementary material for: Untreated vs. Treated Carbon Felt Anodes: Impacts on Power Generation in Microbial Fuel Cells
Source: MDPI journal article supplement (doi:10.3390/mi14122142), 2023-11-23
Supplement: s1 [file s1]

# Untreated vs. Treated Carbon Felt Anodes: Impacts on Power Generation in Microbial Fuel Cells

Abdelghani Ghanam <sup>1,2</sup>, Sebastien Cecillon <sup>1</sup>, Andrei Sabac <sup>1</sup>, Hasna Mohammadi <sup>2</sup>, Aziz Amine <sup>2</sup>, François Buret <sup>1</sup> and Naoufel Haddour <sup>1,\*</sup>

<sup>1</sup> Univ Lyon, Ecole Centrale de Lyon, INSA Lyon, Université Claude Bernard Lyon 1, CNRS, Ampère, UMR5005, 69130 Ecully, France; francois.buret@ec-lyon.fr

<sup>2</sup> Chemical Analysis and Biosensors Group, Laboratory of Process Engineering and Environment, Faculty of Science and Techniques, Hassan II University of Casablanca, B.P 146, Mohammedia 20000, Morocco; a.amine@univh2m.ac.ma

\* Correspondence: naoufel.haddour@ec-lyon.fr; Tel.: +33-4-72-18-61-12

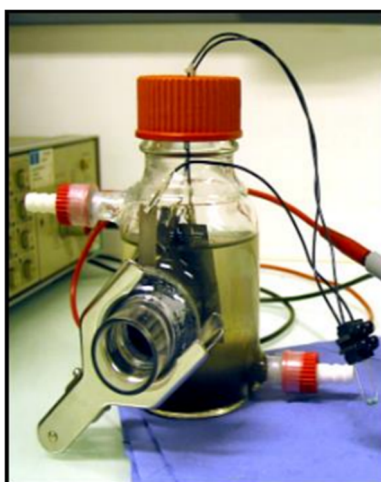

**Figure S1.** MFC bottle with an air cathode.

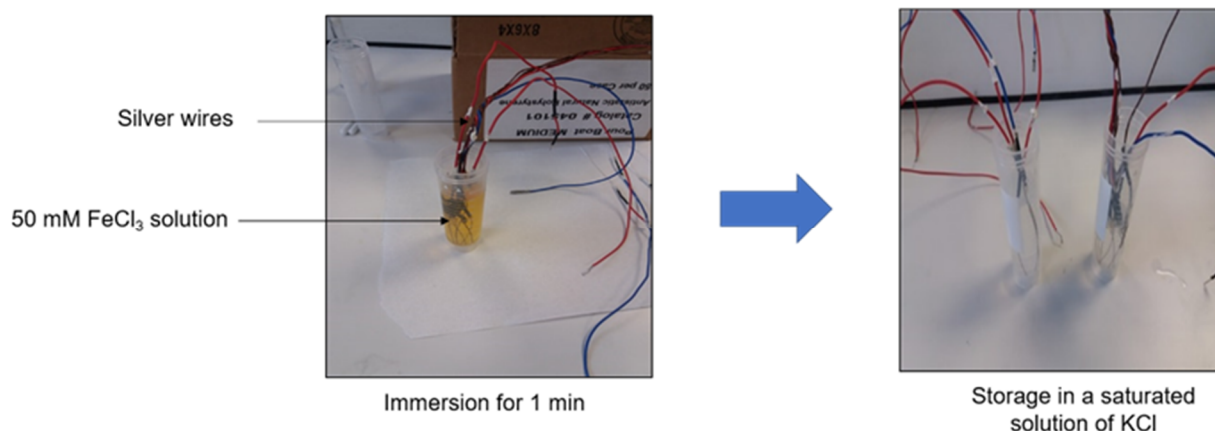

**Figure S2.** Silver wires used to prepare Ag/AgCl electrodes by immersing them in a solution of 50 mM FeCl<sub>3</sub>·6H<sub>2</sub>O (A) to form AgCl films on the silver wires, storage in a saturated solution of KCL (B).

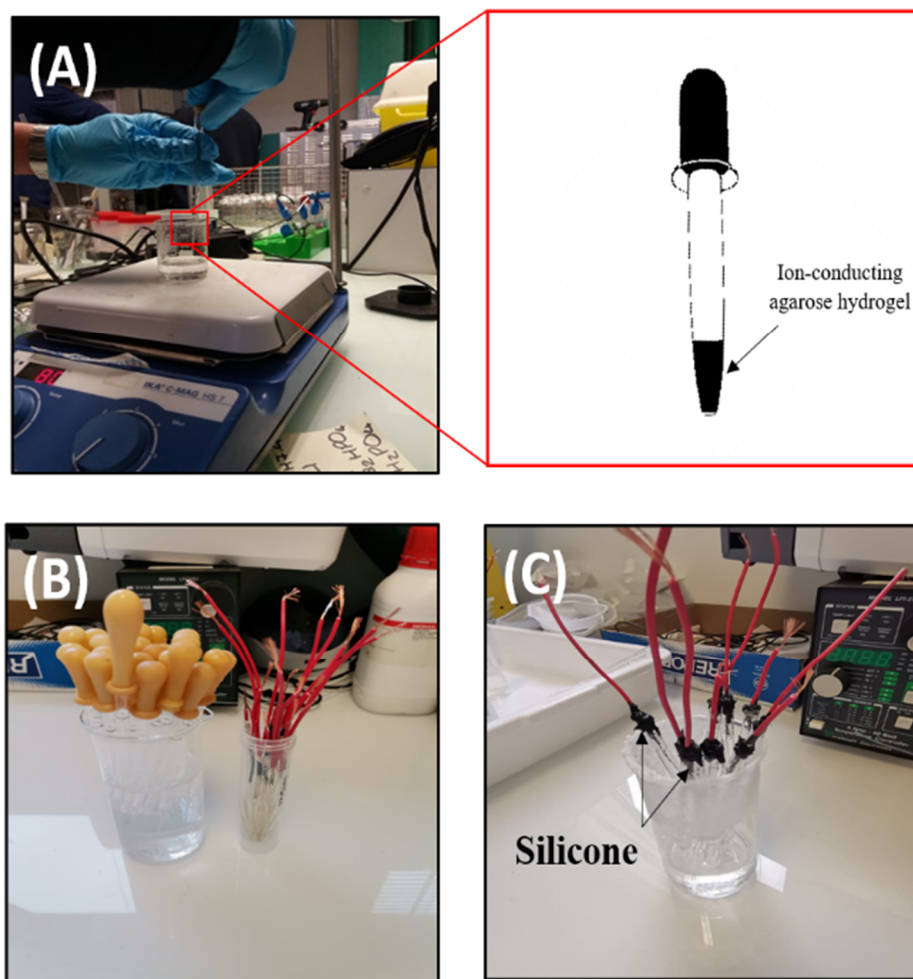

**Figure S3.** (A) Glass Pasteur pipettes plugging with ion-conducting agarose hydrogel. (B) Cool the hydrogel-plugged glass Pasteur pipettes at one end by immersing them in a cold KCl solution. (C) Pasteur pipette closure with silicone and stored in saturated KCl solution.

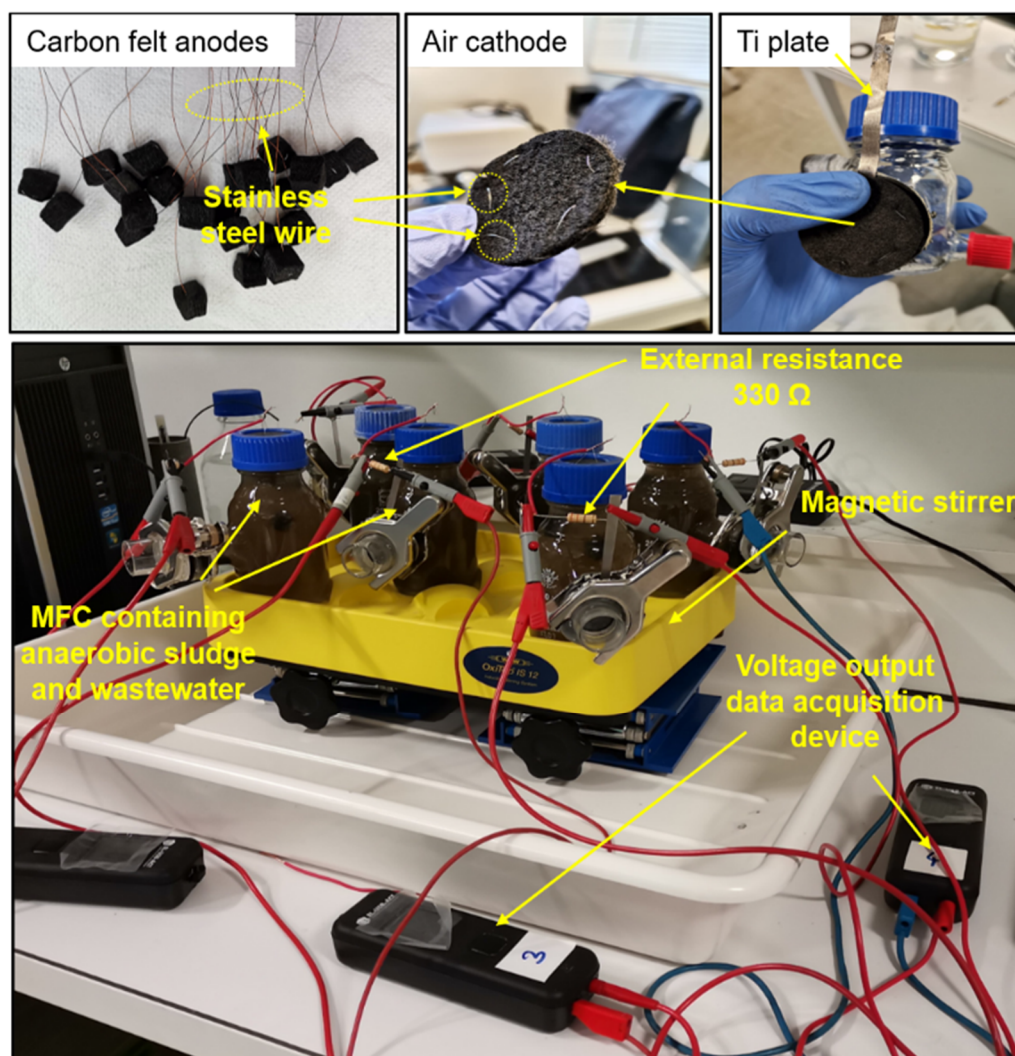

**Figure S4.** Pictures illustrating the components (unmodified/modified CF anodes, CF air-breathing cathodes, etc.) used for single-chamber MFC experimentation and setup. The MFC configuration used is a single-chamber bottle configuration.

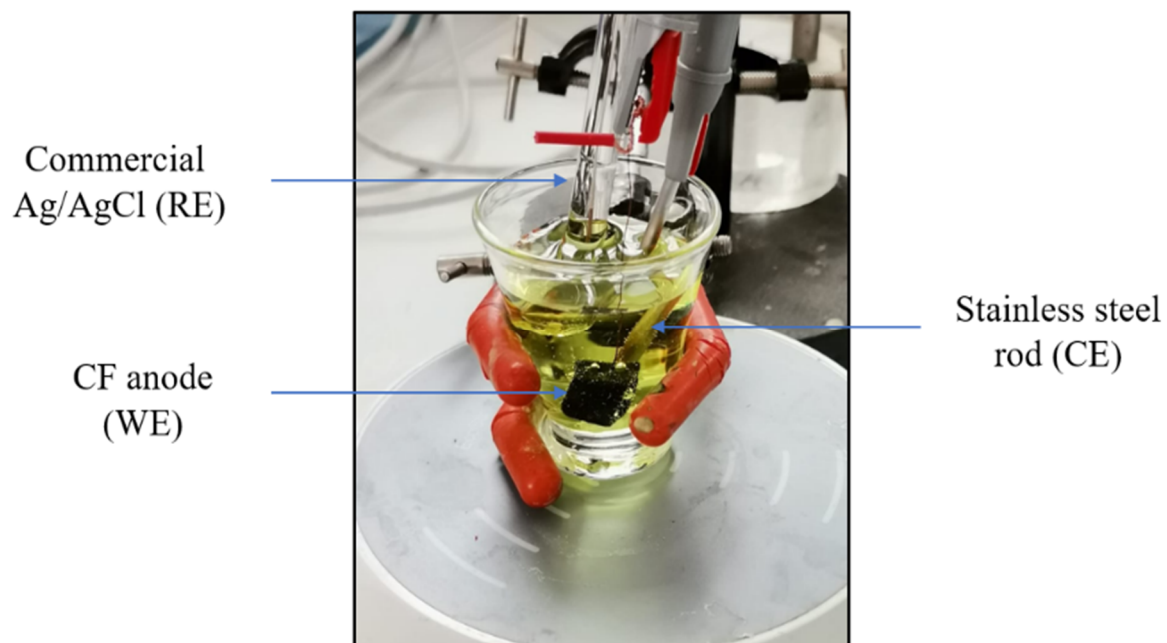**Figure S5.**

The conventional three-electrode electrochemical cell containing 10 mM  $[\text{Fe}(\text{CN})_6]^{3-/4-}$  dissolved in 0.1M KCl.
